# Supplementary material for: Interaction between Movement Proteins of Hibiscus green spot virus
Source: MDPI journal article supplement (doi:10.3390/v14122742), 2022-12-08
Supplement: s1 [file s1]

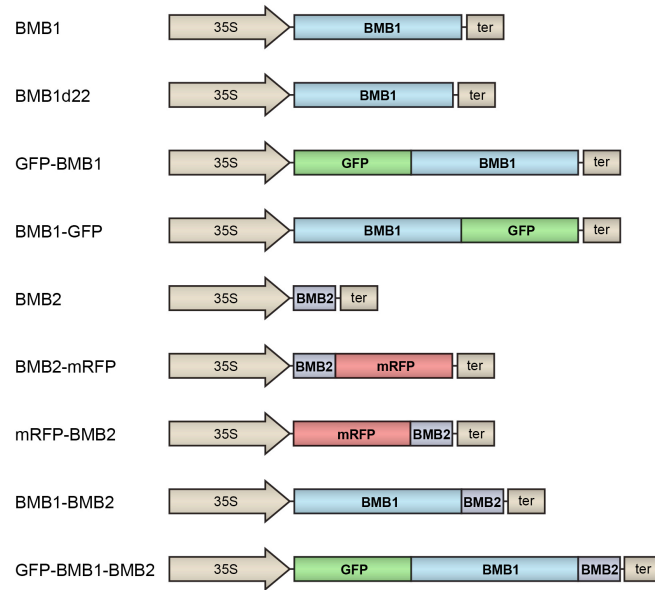

**Figure S1.** Schematic representation of HGSV-specific constructs used in this study. Expression cassettes of binary vectors are presented. Genes are shown as boxes. 35S, the *Cauliflower mosaic virus* 35S promoter; ter, *Cauliflower mosaic virus* 35S terminator.

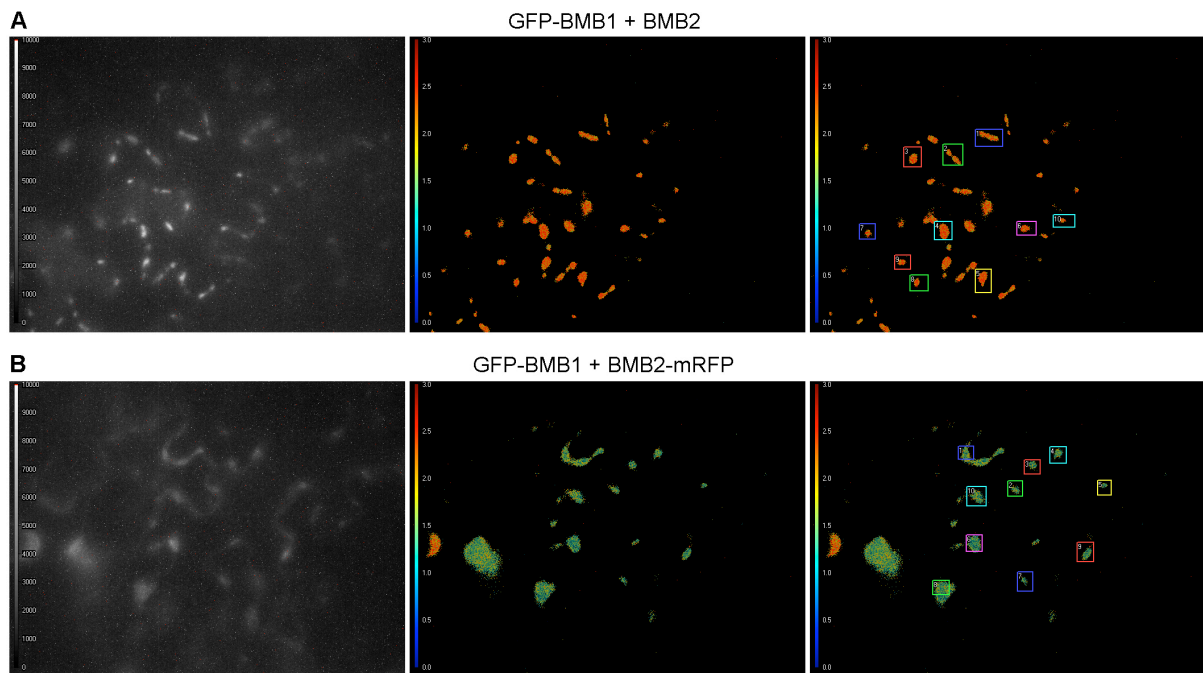

**Figure S2.** Analysis of interaction between BMB1 and BMB2 by FRET-FLIM. Representative FRET-FLIM images of cells coexpressing either the GFP-BMB1 donor with BMB2 (a no-acceptor control) (A), or the GFP-BMB1 donor with the BMB2-mRFP acceptor (B) are shown. Left, donor fluorescence intensity. Center, donor excited-state lifetime map; the color bar indicates lifetime in ns. Right, PAMB-containing areas of measurement shown on the lifetime map.

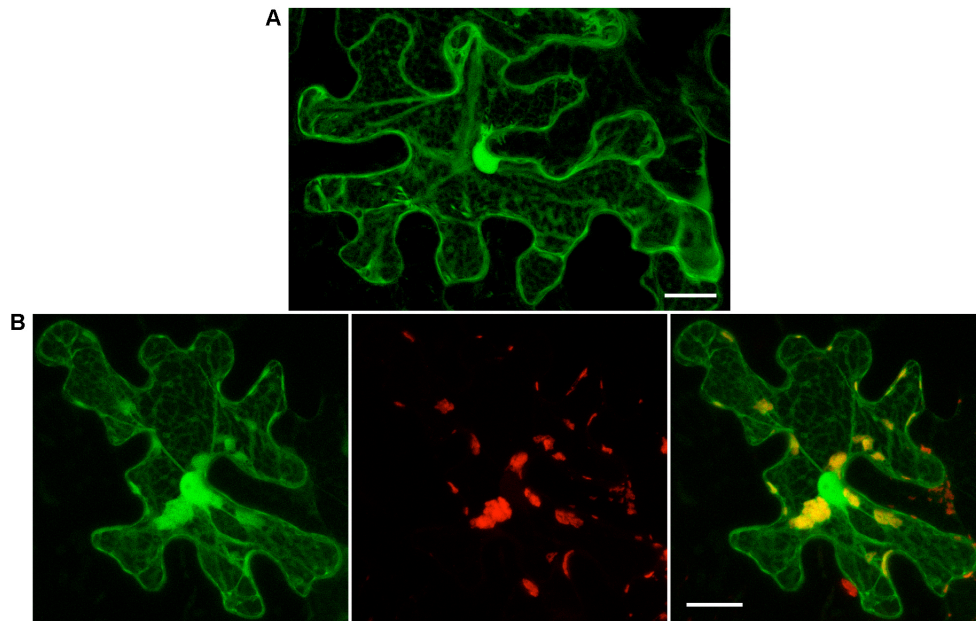

**Figure S3.** Subcellular localization of GFP+22. Confocal microscopy of cells either expressing GFP+22 (A), or coexpressing GFP+22 and BMB2-mRFP (B). Scale bar, 20  $\mu\text{m}$ .

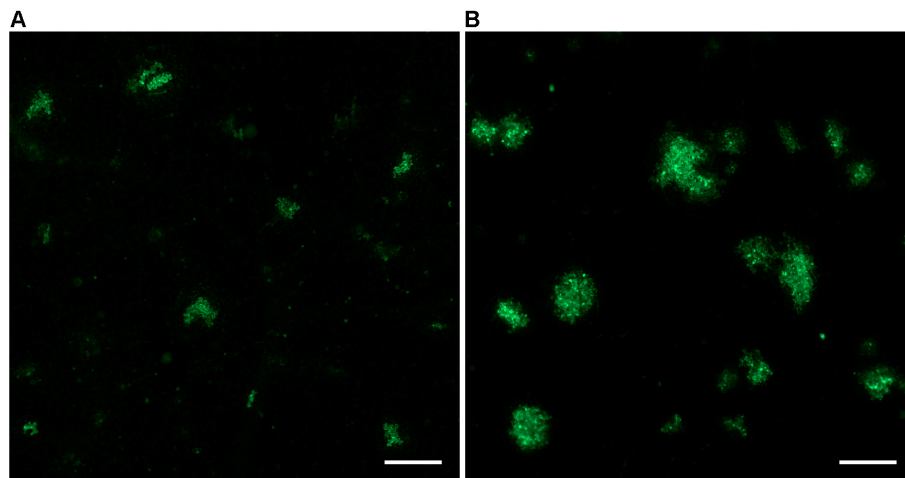

**Figure S4.** Complementation of PVX-POL-GFP cell-to-cell transport. Representative images showing individual fluorescent cells (A) observed in the absence of cell-to-cell transport in a leaf agroinfiltrated for expression of PVX-POL-GFP and multicellular fluorescent loci (B) observed upon complementation of PVX-POL-GFP cell-to-cell transport in the presence of HGSV MPs. Scale bar, 500  $\mu\text{m}$ .

|                     | mN                   | mHydr                               | mMid                        |
|---------------------|----------------------|-------------------------------------|-----------------------------|
|                     | ** * *               | * *                                 | *** * * *                   |
| HGSV                | ---MPIFQQAASNA       | VLFV <b>CASIC</b> VIAYFFF           | ----NPGNPYNVPLSPGHVFPFGGEYA |
| PisVX               | ---MPRFVDNSASSK      | LILVL <b>CF</b> CMLVSAVYIMY         | ---HPGNPYSVPMAPGHVFPFGGRYA  |
| <i>L. sativus</i>   | --MVLVRTPDKKDDTK     | VIIVYGFMVLIG <b>CCFFI</b> YNSVNP    | PGNPYNVGLAPGHVFPFHGGRLI     |
| <i>L. chinensis</i> | MAILNAPGNNVSLNLN     | IV <b>CF</b> CCV <b>CL</b> CFICWCM  | ---NNPGNPYDVGFANGFVFPNGGRYM |
| <i>Q. castanea</i>  | ---MPIISNTQGKGS      | LGLIV <b>CV</b> LVVGF <b>CFWCVC</b> | ---HPGNPFNVGISPGHVFPFHGGSYE |
|                     |                      |                                     |                             |
| HGSV                | VHARFNGPSFPLS--MGGSS | VGLLM <b>LCVILLVVV</b> THM          | -----                       |
| PisVX               | ITAEFYPPRGTVW--RDSSN | LMVLFICLTICCYLRFR                   | -----                       |
| <i>L. sativus</i>   | VTAEYNSPPGWFQ-FKECPS | LNFLLMFVMALITV <b>IFF</b> SSPRLENNR |                             |
| <i>L. chinensis</i> | VQAEFLPPKFSLFNFRGNGS | FSLVLICV <b>GILVYL</b> RF           | -----                       |
| <i>Q. castanea</i>  | IKATFLPQQRSFY-FRESPG | LFL <b>LL</b> FLCVFLAFVVSKLAI       | -----                       |

**Figure S5.** Amino acid sequence alignment of BMB2 proteins. The alignment includes proteins encoded by HGSV, *Pistachio virus X* (PisVX), and virus-like RNAs identified in transcriptomes of *Lathyrus sativus*, *Litchi chinensis* and *Quercus castanea*. Membrane-associated sequence segments predicted by the TMHMM algorithm (<https://services.healthtech.dtu.dk/service.php?TMHMM-2.0>) are shown in yellow color. Residues conserved in the central hydrophilic region are indicated by gray shading. Cysteine residues in the first membrane-binding hydrophobic region are shown in blue color. Residues affected by mutations in mutants mN, mHydr and mMid are shown by asterisks.

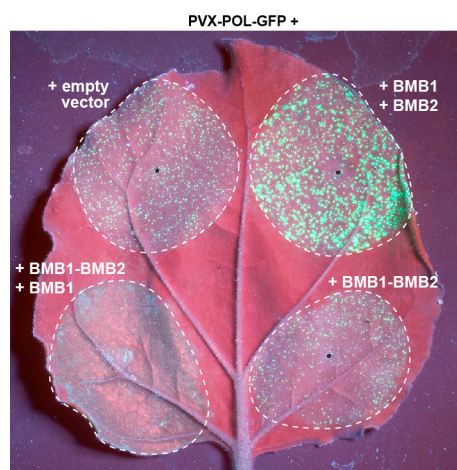

**Figure S6.** Complementation of cell-to-cell movement of PVX-POL-GFP by BMB1-BMB2 and BMB1-BMB2 combination with BMB1. The leaf was coinfiltrated for expression of PVX-POL-GFP and the following constructs as indicated, empty vector (negative control), BMB1 + BMB2 (positive control), BMB1-BMB2, and BMB1-BMB2 + BMB1. The leaf was imaged under UV light at 5 d.p.a. Dashed lines encircle infiltrated areas.

**Table S1. Primers used in this study.**

|                 |                                                                                           |
|-----------------|-------------------------------------------------------------------------------------------|
| BMB2-mN-P       | GCCTCGAGACCATGCCAATTGCTGGAGGTTTCAGCGGGGGGTAACGCGCCCGTGT<br>TGTTT                          |
| BMB2-mHydr-P    | CGCTCGAGACCATGCCGATATTTCAAGGTCAAGCGAAGAGTAACGCGCCCGTGT<br>GTTTGTGGTTGCTAGCATAGCTGTTATAGCG |
| BMB2-mMid-ovl-P | TATAATGTACCTTTGAGTCCTGGTACCGTGTTTCGGTTTCAGCGCAGAGTACGC                                    |
| BMB2-mMid-ovl-M | ACCAGGACTCAAAGGTACATTATAAGAACCTGCAGGATTAAAGAAG                                            |
| BMB1C-BglII-P   | GTCCTGATGTTGAGTTTGTGCG                                                                    |
| BMB1C-d22-M     | CGCTCTAGATTACTGGAAATTATCATGGTCTACCAC                                                      |
| BMB2-C22-P      | GCGGATCCCCGGCATATGAAGATTCTCTT                                                             |
| Right           | CCTTATCTGGGAACTACTCACACATT                                                                |
| Left            | TATCCTTCGCAAGACCCTTCCTCT                                                                  |

**Table S2. Synthetic genes used in this study.**

| Gene     | Sequence                                                                                                                                                                                                                                                                                                                                                                                                                                                                                                                                                                                                                                                                                                                                                                                                                                                                                                                                                                                                                                                                                                                                                        |
|----------|-----------------------------------------------------------------------------------------------------------------------------------------------------------------------------------------------------------------------------------------------------------------------------------------------------------------------------------------------------------------------------------------------------------------------------------------------------------------------------------------------------------------------------------------------------------------------------------------------------------------------------------------------------------------------------------------------------------------------------------------------------------------------------------------------------------------------------------------------------------------------------------------------------------------------------------------------------------------------------------------------------------------------------------------------------------------------------------------------------------------------------------------------------------------|
| BMB1     | GGATCCGATGGAAAGCTTCAACTACGTTACCTCTGCGGATCTGGTTTGCTCCCTGTCTCGTTTTCG<br>TGACTTCTACAAGGAACGTAGCGCGTCTCTGTCTGACGACGACGTTTACGCGGACACCACCCGTGA<br>ATACTCTGCTGCCCTGGACAGCACCGAATTCGTAGATTACAACCTCCAGATCTTCTGCTGAACGG<br>TGTGCCAGGTGGCGGTAAAACCAAATTCGTCTACGAAAACGTTGAAGTGCGTAACTCTTGCGTTGT<br>TGTTCCGTTTAAAGCTCTGAAAGACGAGTACCGCAAACGTGGTTACCGTTCCTTCACCCAGTTCCG<br>TGCACTGCCGTCCGTTTCGTTCCGCAGACATCCTGGTAATCGATGAATACACCTGCGTGTGCTACTC<br>TGTTCTGGTGAGCCTGGTTTACAAACTGCGTCCGGCAACCGTTGCCCTGATCGGTGACTTTAATCA<br>GTGCTGGATTTCGTGACGGCGAGGGTTTCTCTATGGAACCGTTTGTAAGCACCCCTGGTGGTGAACAA<br>GTACCTGTCCGTTTGCTACCGCTGTCCGTGTCCGGACGTAGAGTTTGTTTCGTAACCTACCTGGACCT<br>GGACATTACCCCGGGCAAATGCGGCTCCACCTGTAGCTGCACCGGCTTCAACGTAGAAACCCCTGGT<br>TGAAGGTATGACCTTCGATTACCGCGGTGAAGTTGCGCTGGTGTTCAGCGGCGCGAGCAAATCCTA<br>CCTGGAGTCTATCGGCGTTTCCGCTGTAACCGTCCGTAGCTTCATGGGTAAGCAGGCAGATACCGT<br>TGCGCTGTTTCATCCTGAAAGATCACGACATCCGTCTGCTGGGCGTTTCTTCTCTGAAGCTGGTAGC<br>ATTTACCCGTCACGTTAGCAAACCTGGTTGTTTACAGCGATATGTCCACGATGATGTGGTTCGCTCT<br>GATCGAAGGTGCGACTGAGTCTGGCGAAGTGGTTGACCACGATAAATTCCAGCCGGCGTACGAGGA<br>CAGCCTGGAACAGTACTTCGACCGCCTGCTGCGTGCGGACTTCTACGTTCTGTAACCTCGAG |
| BMB2-QTY | CTCGAGACCATGCCGATATTTCAAGGTCAAGCGAAGAGTAACGCGCCCACTCAATATACATGTGCT<br>AGTACATGTACTACAGCGTATTACTACTATAATCCTGGTAATCCTTATAATGTACCTTTGAGTCCT<br>GGTCACGTGTTCCCTTTTCGGGGGAGAGTACGCGGTTTCATGCTAGGTTCAATGGACCGAGTTTCCCT<br>CTTAGTATGGGTGGTTCTAGTACAGGACAGCAAATGCAGTGTACTACACAACAACTACTACTACG<br>CATATGTAATCTAGA                                                                                                                                                                                                                                                                                                                                                                                                                                                                                                                                                                                                                                                                                                                                                                                                                                                        |
